# Supplementary material for: Repressed expression of a gene for a basic helix-loop-helix protein causes a white flower phenotype in carnation
Source: PubMed Central journal article supplement — Breed Sci. 2018 Feb 27;68(1):139–43. doi: 10.1270/jsbbs.17072 (PMC5903971; doi:10.1270/jsbbs.17072), 2018-02-27
Supplement: 68_17072_2.pdf [file 68_17072_2.pdf]

Supplemental Table 1. Primer sequences for PCR

| Primer sequences used for quantitative RT-PCR |                                     |
|-----------------------------------------------|-------------------------------------|
| Primer                                        | Nucleotide sequence                 |
| DFR Fwd                                       | 5'-GGACTACAAGGAGGACATGGGGCAA-3'     |
| DFR Rv                                        | 5'-CCATTTTCATGATGTTCTAGGGAAAGAGG-3' |
| ANS Fwd                                       | 5'-GGCTAACAATGCTAGCGGCC-3'          |
| ANS Rv                                        | 5'-GCAGGGATGTAATCCTCAGGGG-3'        |
| GST Fwd                                       | 5'-GTATGAGGAGCGACTCTCGAAGAGC-3'     |
| GST Rv                                        | 5'-CAACCAGGTGTGGCATTTTGGC-3'        |
| bHLH Fwd                                      | 5'-CGACTTTAAGATCGTTGATTCCTTCCG-3'   |
| bHLH Rv                                       | 5'-CCAAGTCTTCTACTCTTCTCTCGAGC-3'    |
| Actin Fwd                                     | 5'-CCGACCACCTCATGAAGATT-3'          |
| Actin Rv                                      | 5'-AGCAATGTACGCCAGCTTCT-3'          |

  

| Primer sequences used for PCR to amplify full length cDNAs |                                     |
|------------------------------------------------------------|-------------------------------------|
| Primer                                                     | Nucleotide sequence                 |
| F3H Fwd                                                    | 5'-ATGGTCGCTGAAAAACCCAAAACGC-3'     |
| F3H Rv                                                     | 5'-CTAAGCAAGTATTTGGTCAATAGATTTGG-3' |
| DFR Fwd 2                                                  | 5'-ATGGTTTCTAGTACAATTAACGAGACACT-3' |
| DFR Rv 2                                                   | 5'-TTAAGCAGATCCATTTTCATGATGTTC-3'   |
